# Supplementary material for: Electrodeposition of Hybrid Magnetostrictive/Magnetoelectric Layered Systems
Source: MDPI journal article supplement (doi:10.3390/ma14216304), 2021-10-22
Supplement: s1 [file s1]

# Electrodeposition of Hybrid Magnetostrictive/Magnetoelectric Layered Systems

Sara Abad <sup>1</sup>, Alicia Prados <sup>1</sup>, Marco Maicas <sup>2</sup>, Neven Biskup <sup>1,3</sup>, Maria Varela <sup>1,3</sup> and Rocio Ranchal <sup>1,4,\*</sup>

<sup>1</sup> Departamento Física de Materiales, Facultad Ciencias Físicas. Universidad Complutense de Madrid, Plaza de las Ciencias 1, 28040 Madrid, Spain; sarabad@ucm.es (S.A.); aliciapradosdiaz@ucm.es (A.P.); nbiskup@pdi.ucm.es (N.B.); mvarela@fis.ucm.es (M.V.)

<sup>2</sup> Institute for Optoelectronic Systems and Microtechnology, Polytechnic University of Madrid, Avenida Complutense 30, 28040 Madrid, Spain; marco.maicas@upm.es

<sup>3</sup> Instituto Pluridisciplinar, Universidad Complutense de Madrid, Paseo Juan XXIII 1, 28040 Madrid, Spain

<sup>4</sup> Instituto de Magnetismo Aplicado, Universidad Complutense de Madrid-Adif-Consejo Superior de Investigaciones Científicas, P.O. Box 155, Las Rozas, Madrid 28230, Spain

\* Correspondence: [rociran@ucm.es](mailto:rociran@ucm.es)

SEM images of samples deposited at -1.150 V for electrolytes I and II, respectively.

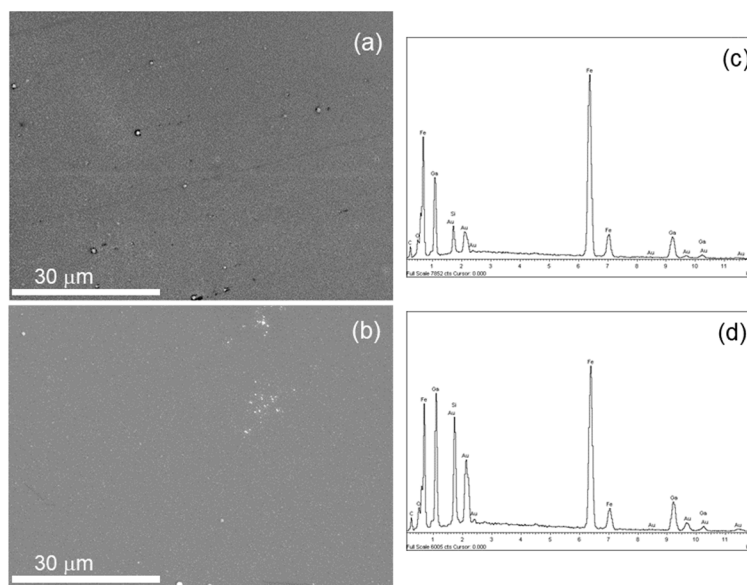

**Figure S1.** SEM images for samples grown with electrolytes I and II for a potential of -1.150 V. (a) Electrolyte I. (b) Electrolyte II. (c) and (d) are EDS spectrum of samples of (a) and (b), respectively.

Root-mean-square (rms) obtained from the AFM images for the samples studied in this work. rms for uncoated substrates is 3.4 nm.

| Elec. | Potential (V) | rms (nm) |
|-------|---------------|----------|
| I     | -1.150        | 9.8      |
|       | -1.100        | 14.0     |
|       | -1.075        | 11.3     |
|       | -1.150        | 9.7      |
| II    | -1.100        | 8.6      |
|       | -1.075        | 8.7      |
|       | -1.150        | 3D       |
|       | -1.100        | 3D       |
| III   | -1.075        | 3D       |
|       | -1.150        | 13.3     |

|        |      |
|--------|------|
| -1.100 | 12.8 |
| -1.075 | 11.9 |
